# Supplementary material for: Drug Lag and Associated Factors for Approved Drugs in Korea Compared with the United States
Source: MDPI journal article supplement (doi:10.3390/ijerph19052857), 2022-03-01
Supplement: s1 [file s1]

**Table S1. Multivariate linear regression analysis for drug lag.**

| Variable                                                          |                                | Coefficient | Standard Error | Confidence interval    | p-value |
|-------------------------------------------------------------------|--------------------------------|-------------|----------------|------------------------|---------|
| <b>Regulatory pathway in Korea</b>                                | New drug review by MFDS        | reference   |                |                        |         |
|                                                                   | Orphan drug review by MFDS     | 25.012      | 7.4515         | ( 10.4071 - 39.6167 )  | 0.0008  |
| <b>Nationality of the Marketing authorization holder (MAH)</b>    | Non-Korean Company             | reference   |                |                        |         |
|                                                                   | Korean Company                 | 56.526      | 10.4251        | ( 36.0929 - 76.9585 )  | <.0001  |
| <b>Drug characteristics - Type of drug</b>                        | Chemical Drugs                 | reference   |                |                        |         |
|                                                                   | Biological Drugs               | -2.126      | 8.84           | ( -19.4516 - 15.2005 ) | 0.81    |
| <b>Drug characteristics - Therapeutic area</b>                    | non-oncology Drugs             | reference   |                |                        |         |
|                                                                   | Oncology Drugs                 | -6.583      | 7.2312         | ( -20.756 - 7.5898 )   | 0.3626  |
| <b>Nationality of pharmaceutical company for drug development</b> | USA                            | reference   |                |                        |         |
|                                                                   | Europe (including Switzerland) | -4.974      | 7.3202         | ( -19.321 - 9.3737 )   | 0.4969  |
|                                                                   | Japan                          | -2.235      | 12.7845        | ( -27.2919 - 22.8225 ) | 0.8612  |
|                                                                   | Others                         | -1.483      | 21.5827        | ( -43.7841 - 40.8185 ) | 0.9452  |
| <b>Regulatory pathway in US</b>                                   | Standard review by US FDA      | reference   |                |                        |         |
|                                                                   | Priority review by US FDA      | 11.336      | 7.955          | ( -4.2551 - 26.9279 )  | 0.1541  |
| <b>Approved year by MFDS</b>                                      | Approved drugs before 2015     | reference   |                |                        |         |
|                                                                   | Approved Drugs since 2015      | -32.207     | 8.7913         | ( -49.438 - -14.9767 ) | 0.0002  |

**Table S2. Multivariate linear regression analysis on drug lag for non-orphan drugs related with clinical studies in Korea.**

| Variable                                                                       |                                | Coefficient | Standard Error | Confidence interval    | <i>p-value</i> |
|--------------------------------------------------------------------------------|--------------------------------|-------------|----------------|------------------------|----------------|
| <b>Development lag from the initial clinical study to approval of the drug</b> |                                | 0.181       | 0.1196         | ( -0.0532 - 0.4156 )   | 0.1298         |
| <b>Drug characteristics - Type of drug</b>                                     | Chemical Drugs                 | reference   |                |                        |                |
|                                                                                | Biological Drugs               | -3.960      | 4.4894         | ( -12.7592 - 4.8391 )  | 0.3777         |
| <b>Drug characteristics - Therapeutic area</b>                                 | non-oncology Drugs             | reference   |                |                        |                |
|                                                                                | Oncology Drugs                 | 14.958      | 3.7716         | ( 7.5653 - 22.3496 )   | <.0001         |
| <b>Nationality of pharmaceutical company for drug development</b>              | USA                            | reference   |                |                        |                |
|                                                                                | Europe (including Switzerland) | -4.391      | 4.0055         | ( -12.242 - 3.4593 )   | 0.2729         |
|                                                                                | Japan                          | -9.404      | 7.0536         | ( -23.2286 - 4.4209 )  | 0.1825         |
| <b>Regulatory pathway in US</b>                                                | Standard review by US FDA      | reference   |                |                        |                |
|                                                                                | Priority review by US FDA      | -5.046      | 4.4423         | ( -13.7528 - 3.6605 )  | 0.256          |
| <b>Number of clinical studies in Korea</b>                                     |                                | -6.429      | 2.3759         | ( -11.0856 - -1.7724 ) | 0.0068         |
| <b>Number of Korean patients participated in clinical studies in Korea</b>     |                                | 0.067       | 0.0253         | ( 0.0172 - 0.1162 )    | 0.0083         |
