# Supplementary material for: Drug Lag and Associated Factors for Approved Drugs in Korea Compared with the United States
Source: MDPI journal article supplement (doi:10.3390/ijerph19052857), 2022-03-01

**Figure S1. Distribution of drug lag for new drug approved with local clinical studies between USA and Korea during 2013-2019.**

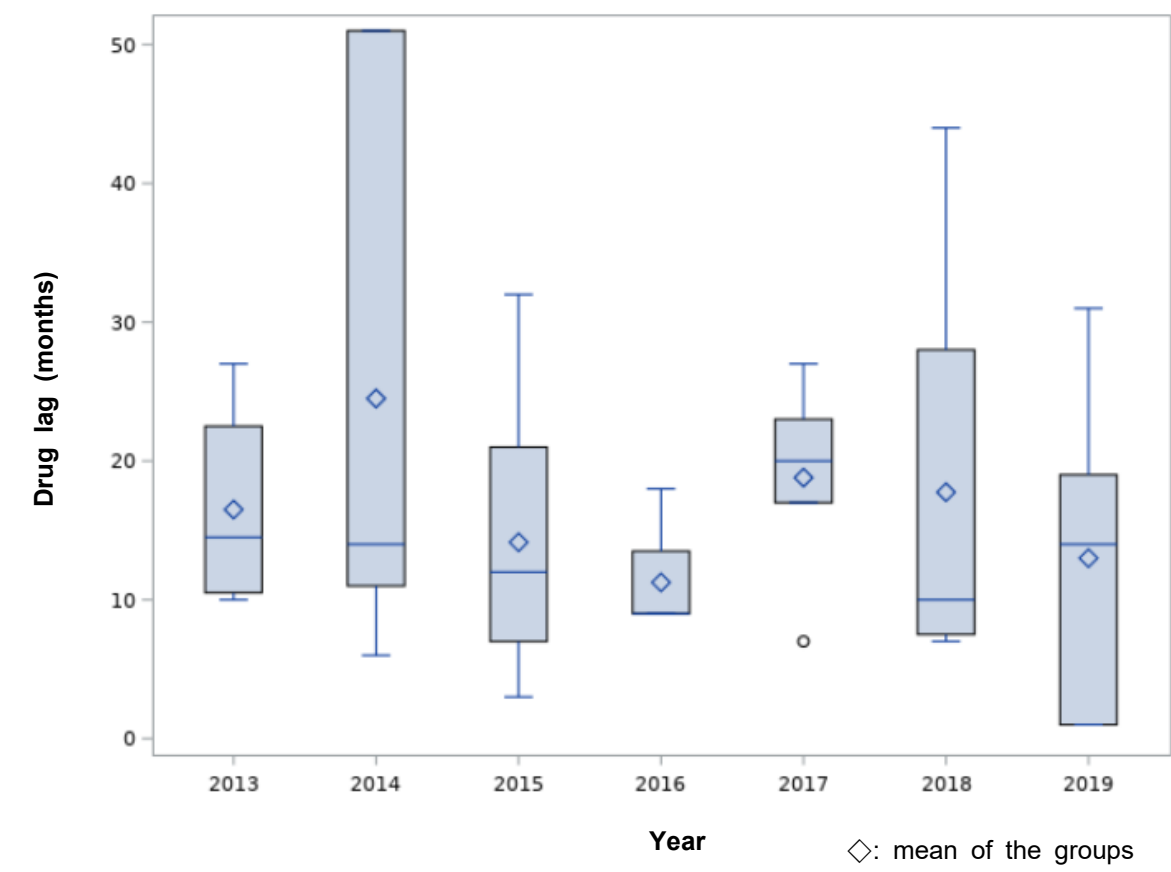

**Figure S2. Relationship between drug lag in Korea and clinical study related factors.**

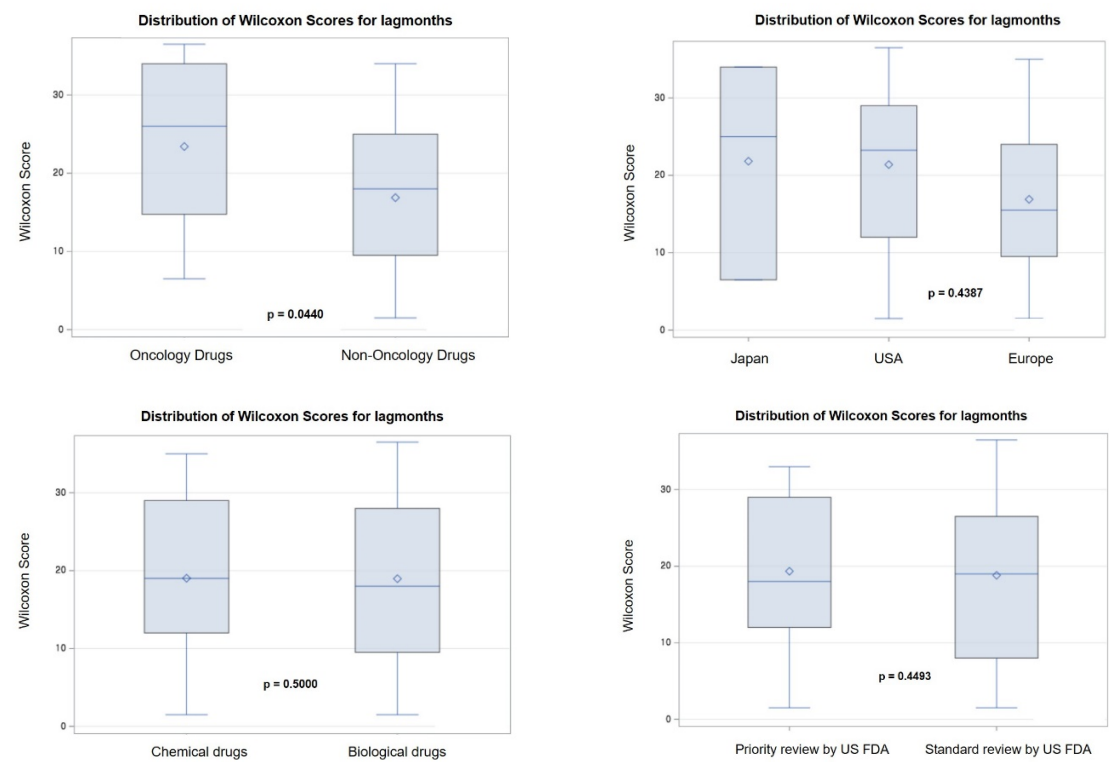

Supplement: s1 [file s1]
